# Supplementary material
Source: PubMed Central journal article supplement (PMC7438303)

Supplemental Table 1. Study Definitions by ICD-9 and 10 Codes

| Variable                                 | ICD-9-CM                                                                                                                                                                             | ICD-10-CM                                                                                                                                                                                             | Comment                                                                                                                                                                                                                                                                                                                                                                                                                                                                                                                                                                                                                                                                                                                                                                                                                                                                                                                                                                                                                                                                                                                                                                                                                                            |
|------------------------------------------|--------------------------------------------------------------------------------------------------------------------------------------------------------------------------------------|-------------------------------------------------------------------------------------------------------------------------------------------------------------------------------------------------------|----------------------------------------------------------------------------------------------------------------------------------------------------------------------------------------------------------------------------------------------------------------------------------------------------------------------------------------------------------------------------------------------------------------------------------------------------------------------------------------------------------------------------------------------------------------------------------------------------------------------------------------------------------------------------------------------------------------------------------------------------------------------------------------------------------------------------------------------------------------------------------------------------------------------------------------------------------------------------------------------------------------------------------------------------------------------------------------------------------------------------------------------------------------------------------------------------------------------------------------------------|
| <b>Liver Disease Groups</b>              |                                                                                                                                                                                      |                                                                                                                                                                                                       |                                                                                                                                                                                                                                                                                                                                                                                                                                                                                                                                                                                                                                                                                                                                                                                                                                                                                                                                                                                                                                                                                                                                                                                                                                                    |
| Nonalcoholic fatty liver disease (NAFLD) | 571.8                                                                                                                                                                                | K75.81,<br>K76.0                                                                                                                                                                                      | <p>Discharge records with these codes and either another chronic liver disease or alcohol condition were excluded from analysis. Excludes n=150 for concomitant chronic liver disease and additional n=45 for alcohol condition. These are weighted sample sizes based on the logistic regression analysis for 2012-2016, and these exclusions were applied after excluding patients with acute liver diseases (further defined below).</p> <p>K75.81 Nonalcoholic steatohepatitis (NASH)<br/>K76.0 Fatty liver, not elsewhere classified,<br/>Nonalcoholic fatty liver disease (NAFLD)</p>                                                                                                                                                                                                                                                                                                                                                                                                                                                                                                                                                                                                                                                        |
| Other Chronic Liver Diseases (non-NAFLD) | 571.[0123569]<br>571.4[0129]<br>573.[09]<br>070.2[0123]<br>070.3[0123]<br>070.4[249]<br>070.5[249]<br>070.6<br>070.7[01]<br>070.9<br>V02.6[0129]<br>273.4<br>275.1<br>453.0<br>576.1 | K70.[01]<br>K70.1[01]<br>K70.2<br>K70.3<br>K70.30<br>K70.31<br>K70.4<br>K70.4[01]<br>K70.9<br>K71.3<br>K71.4<br>K71.5[01]<br>K71.7<br>K72.1<br>K72.1[01]<br>K73.[01289]<br>K74.[0123456]<br>K74.6[09] | <p>ICD-9 Code Descriptions</p> <p>571.0 Alcoholic fatty liver<br/>                     571.1 Acute alcoholic hepatitis (included as chronic liver disease as majority of patients have chronic liver damage)<br/>                     571.2 Alcoholic cirrhosis of liver<br/>                     571.3 Alcoholic liver damage, unspecified<br/>                     571.4 Chronic hepatitis<br/>                     571.5 Cirrhosis of liver without mention of alcohol<br/>                     571.6 Biliary cirrhosis<br/>                     571.9 Unspecified chronic liver disease without mention of alcohol<br/>                     573.0 Chronic passive congestion of liver<br/>                     573.9 Unspecified disorder of liver</p> <p>070.2x/070.3x Viral hepatitis B with/without hepatic coma<br/>                     070.42 Hepatitis delta without mention of active hepatitis B disease with hepatic coma, Hepatitis delta with hepatitis B carrier state<br/>                     070.44 Chronic hepatitis C with hepatic coma<br/>                     070.49 Other specified viral hepatitis with hepatic coma<br/>                     070.5 Other specified viral hepatitis without mention of hepatic coma</p> |

|  |  |                                                                                                                                                                                                                                                                                                                              |                                                                                                                                                                                                                                                                                                                                                                                                                                                                                                                                                                                                                                                                                                                                                                                                                                                                                                                                                                                                                                                                                                                                                                                                                                                                                                                                                                                                                                                                                                                                                                                                                                                                                                                                                    |
|--|--|------------------------------------------------------------------------------------------------------------------------------------------------------------------------------------------------------------------------------------------------------------------------------------------------------------------------------|----------------------------------------------------------------------------------------------------------------------------------------------------------------------------------------------------------------------------------------------------------------------------------------------------------------------------------------------------------------------------------------------------------------------------------------------------------------------------------------------------------------------------------------------------------------------------------------------------------------------------------------------------------------------------------------------------------------------------------------------------------------------------------------------------------------------------------------------------------------------------------------------------------------------------------------------------------------------------------------------------------------------------------------------------------------------------------------------------------------------------------------------------------------------------------------------------------------------------------------------------------------------------------------------------------------------------------------------------------------------------------------------------------------------------------------------------------------------------------------------------------------------------------------------------------------------------------------------------------------------------------------------------------------------------------------------------------------------------------------------------|
|  |  | <p>K75.[349]<br/> K75.4<br/> K75.89<br/> K76<br/> K76.[123456789]<br/> K76.8[19]<br/> K77</p> <p>B18.[01289]</p> <p>B19.[01]<br/> B19.1[01]<br/> B19.2<br/> B19.2[01]<br/> B19.9</p> <p>E83.01<br/> E83.11<br/> E83.11[0189]</p> <p>O98.41<br/> O98.41[1239]<br/> O98.42<br/> O98.43</p> <p>I82.0<br/> K83.0<br/> E88.01</p> | <p>070.52 Hepatitis delta without mention of active hepatitis B disease or hepatic coma<br/> 070.54 Chronic hepatitis C without mention of hepatic coma<br/> 070.59 Other specified viral hepatitis without mention of hepatic coma<br/> 070.6 Unspecified viral hepatitis with hepatic coma<br/> 070.7 Unspecified viral hepatitis C<br/> 070.70 Unspecified viral hepatitis C without hepatic coma, Unspecified viral hepatitis C NOS<br/> 070.71 Unspecified viral hepatitis C with hepatic coma<br/> 070.9 Unspecified viral hepatitis without mention of hepatic coma, Viral hepatitis NOS</p> <p>V02.6 Carrier or suspected carrier of viral hepatitis<br/> V02.60 Viral hepatitis carrier, unspecified<br/> V02.61 Hepatitis B carrier<br/> V02.62 Hepatitis C carrier<br/> V02.69 Other viral hepatitis carrier</p> <p>273.4 alpha 1 antitrypsin deficiency<br/> 275.1 Disorders of copper metabolism (captures Wilson's disease)<br/> 453.0 Budd-chiari syndrome<br/> 576.1 Cholangitis (captures primary sclerosing cholangitis)</p> <p>ICD-10 Code Descriptions</p> <p>K70.0 Alcoholic fatty liver<br/> K70.1 Alcoholic hepatitis<br/> K70.2 Alcoholic fibrosis and sclerosis of liver<br/> K70.3 Alcoholic cirrhosis of liver<br/> K70.3[01] Alcoholic cirrhosis of liver without/with ascites<br/> K70.4 Alcoholic hepatic failure<br/> K70.4[01] Alcoholic hepatic failure without/with coma<br/> K70.9 Alcoholic liver disease, unspecified</p> <p>K71.3 Toxic liver disease with chronic persistent hepatitis<br/> K71.4 Toxic liver disease with chronic lobular hepatitis<br/> K71.5 Toxic liver disease with chronic active hepatitis<br/> K71.5[01] Toxic liver disease with chronic active hepatitis without/with ascites</p> |
|--|--|------------------------------------------------------------------------------------------------------------------------------------------------------------------------------------------------------------------------------------------------------------------------------------------------------------------------------|----------------------------------------------------------------------------------------------------------------------------------------------------------------------------------------------------------------------------------------------------------------------------------------------------------------------------------------------------------------------------------------------------------------------------------------------------------------------------------------------------------------------------------------------------------------------------------------------------------------------------------------------------------------------------------------------------------------------------------------------------------------------------------------------------------------------------------------------------------------------------------------------------------------------------------------------------------------------------------------------------------------------------------------------------------------------------------------------------------------------------------------------------------------------------------------------------------------------------------------------------------------------------------------------------------------------------------------------------------------------------------------------------------------------------------------------------------------------------------------------------------------------------------------------------------------------------------------------------------------------------------------------------------------------------------------------------------------------------------------------------|

|  |  |  |                                                                                                                                                                                                                                                                                                                                                                                                                                                                                                                                                                                                                                                                                                                                                                                                                                                                                                                                                                                                                                                                                                                                                                                                                                                                                                                                                                                                                                                                                                                                                                                                                                                                                                                                                                                                                                                                                                                                                                                                |
|--|--|--|------------------------------------------------------------------------------------------------------------------------------------------------------------------------------------------------------------------------------------------------------------------------------------------------------------------------------------------------------------------------------------------------------------------------------------------------------------------------------------------------------------------------------------------------------------------------------------------------------------------------------------------------------------------------------------------------------------------------------------------------------------------------------------------------------------------------------------------------------------------------------------------------------------------------------------------------------------------------------------------------------------------------------------------------------------------------------------------------------------------------------------------------------------------------------------------------------------------------------------------------------------------------------------------------------------------------------------------------------------------------------------------------------------------------------------------------------------------------------------------------------------------------------------------------------------------------------------------------------------------------------------------------------------------------------------------------------------------------------------------------------------------------------------------------------------------------------------------------------------------------------------------------------------------------------------------------------------------------------------------------|
|  |  |  | <p>K71.7 Toxic liver disease with fibrosis and cirrhosis of liver</p> <p>K73 Chronic hepatitis, not elsewhere classified<br/> K73.0 Chronic persistent hepatitis, not elsewhere classified<br/> K73.1 Chronic lobular hepatitis, not elsewhere classified<br/> K73.2 Chronic active hepatitis, not elsewhere classified<br/> K73.8 Other chronic hepatitis, not elsewhere classified<br/> K73.9 Chronic hepatitis, unspecified</p> <p>K74.0 Hepatic fibrosis<br/> K74.1 Hepatic sclerosis<br/> K74.2 Hepatic fibrosis with hepatic sclerosis<br/> K74.3 Primary biliary cirrhosis, Chronic nonsuppurative destructive cholangitis<br/> K74.4 Secondary biliary cirrhosis<br/> K74.5 Biliary cirrhosis, unspecified<br/> K74.6 Other and unspecified cirrhosis of liver<br/> K74.60 Unspecified cirrhosis of liver<br/> K74.69 Other cirrhosis of liver, including Cryptogenic, Macronodular, Micronodular, Mixed type, Portal, Postnecrotic<br/> K75.3 Granulomatous hepatitis, not elsewhere classified<br/> K75.4 Autoimmune hepatitis, Lupoid hepatitis NEC<br/> K75.8 Other specified inflammatory liver diseases (not including 75.81 NASH)<br/> K75.89 Other specified inflammatory liver diseases<br/> K75.9 Inflammatory liver disease, unspecified<br/> K76.1 Chronic passive congestion of liver, Cardiac cirrhosis Cardiac sclerosis<br/> K76.2 Central hemorrhagic necrosis of liver<br/> K76.3 Infarction of liver<br/> K76.4 Peliosis hepatis, Hepatic angiomatosis<br/> K76.5 Hepatic veno-occlusive disease<br/> K76.6 Portal hypertension<br/> K76.7 Hepatorenal syndrome<br/> K76.8 Other specified diseases of liver<br/> K76.81 Hepatopulmonary syndrome<br/> K76.89 Other specified diseases of liver, Cyst (simple) of liver, Focal nodular hyperplasia of liver Hepatoptosis<br/> K76.9 Liver disease, unspecified<br/> K77 Liver disorders in diseases classified elsewhere<br/> K83.0 Cholangitis without liver abscess (captures primary sclerosing cholangitis)</p> |
|--|--|--|------------------------------------------------------------------------------------------------------------------------------------------------------------------------------------------------------------------------------------------------------------------------------------------------------------------------------------------------------------------------------------------------------------------------------------------------------------------------------------------------------------------------------------------------------------------------------------------------------------------------------------------------------------------------------------------------------------------------------------------------------------------------------------------------------------------------------------------------------------------------------------------------------------------------------------------------------------------------------------------------------------------------------------------------------------------------------------------------------------------------------------------------------------------------------------------------------------------------------------------------------------------------------------------------------------------------------------------------------------------------------------------------------------------------------------------------------------------------------------------------------------------------------------------------------------------------------------------------------------------------------------------------------------------------------------------------------------------------------------------------------------------------------------------------------------------------------------------------------------------------------------------------------------------------------------------------------------------------------------------------|

|                                                                         |                                                                    |                                                                               |                                                                                                                                                                                                                                                                                                                                                                                                                                                                                                                                                                                                                                                                                                                                                                                                                                                                                                                                                                                                                                                                                                                                                                                                                                                                                                                                                                                                                         |
|-------------------------------------------------------------------------|--------------------------------------------------------------------|-------------------------------------------------------------------------------|-------------------------------------------------------------------------------------------------------------------------------------------------------------------------------------------------------------------------------------------------------------------------------------------------------------------------------------------------------------------------------------------------------------------------------------------------------------------------------------------------------------------------------------------------------------------------------------------------------------------------------------------------------------------------------------------------------------------------------------------------------------------------------------------------------------------------------------------------------------------------------------------------------------------------------------------------------------------------------------------------------------------------------------------------------------------------------------------------------------------------------------------------------------------------------------------------------------------------------------------------------------------------------------------------------------------------------------------------------------------------------------------------------------------------|
|                                                                         |                                                                    |                                                                               | <p>B18.0/1 Chronic viral hepatitis B with/without delta-agent<br/> B18.2 Chronic viral hepatitis C<br/> B18.8 Other chronic viral hepatitis<br/> B18.9 Chronic viral hepatitis, unspecified<br/> B19 Unspecified viral hepatitis</p> <p>B19.0 Unspecified viral hepatitis with hepatic coma<br/> B19.1 Unspecified viral hepatitis B<br/> B19.10 Unspecified viral hepatitis B without hepatic coma, Unspecified viral hepatitis B NOS<br/> B19.11 Unspecified viral hepatitis B with hepatic coma<br/> B19.2 Unspecified viral hepatitis C<br/> B19.20 Unspecified viral hepatitis C without hepatic coma, Viral hepatitis C NOS<br/> B19.21 Unspecified viral hepatitis C with hepatic coma<br/> B19.9 Unspecified viral hepatitis without hepatic coma, Viral hepatitis NOS</p> <p>E83.01 Wilson's disease<br/> E83.11 Hemochromatosis<br/> E83.110 Hereditary hemochromatosis: Bronzed diabetes, Pigmentary cirrhosis (of liver), Primary (hereditary) hemochromatosis<br/> E83.111 Hemochromatosis due to repeated red blood cell transfusions: Iron overload due to repeated red blood cell transfusions, Transfusion (red blood cell) associated hemochromatosis<br/> E83.118 Other hemochromatosis<br/> E83.119 Hemochromatosis, unspecified</p> <p>O98.4x Viral hepatitis complicating pregnancy, childbirth and the puerperium<br/> I82.0 Budd-chiari syndrome<br/> E88.01 alpha 1 antitrypsin deficiency</p> |
| <b>Exclusions:</b>                                                      |                                                                    |                                                                               |                                                                                                                                                                                                                                                                                                                                                                                                                                                                                                                                                                                                                                                                                                                                                                                                                                                                                                                                                                                                                                                                                                                                                                                                                                                                                                                                                                                                                         |
| Alcohol abuse/disorders (not including alcoholic liver disease which is | 291<br>291.[01234589]<br>291.8[129]<br>303<br>303.0<br>303.0[0123] | F10.1<br>F10.1[024589]<br>F10.12[019]<br>F10.15[019]<br>F10.18[0128]<br>F10.2 | Discharge records with NAFLD code(s) as well as any alcohol abuse/disorder codes were excluded from the analysis given inability to distinguish alcohol induced fatty liver disease from NAFLD. This excluded n=45 from the NAFLD group.<br><br>ICD-9 Code Descriptions                                                                                                                                                                                                                                                                                                                                                                                                                                                                                                                                                                                                                                                                                                                                                                                                                                                                                                                                                                                                                                                                                                                                                 |

|                                |                                                                                                                                                                                         |                                                                                                                                                                                                                                                                                                                                    |                                                                                                                                                                                                                                                                                                                                                                                                                                                                                                                                                                                                                                                                                                                                                                                                                                                                                                                                                                                                                                                                                                                                                                                                                                                                                      |
|--------------------------------|-----------------------------------------------------------------------------------------------------------------------------------------------------------------------------------------|------------------------------------------------------------------------------------------------------------------------------------------------------------------------------------------------------------------------------------------------------------------------------------------------------------------------------------|--------------------------------------------------------------------------------------------------------------------------------------------------------------------------------------------------------------------------------------------------------------------------------------------------------------------------------------------------------------------------------------------------------------------------------------------------------------------------------------------------------------------------------------------------------------------------------------------------------------------------------------------------------------------------------------------------------------------------------------------------------------------------------------------------------------------------------------------------------------------------------------------------------------------------------------------------------------------------------------------------------------------------------------------------------------------------------------------------------------------------------------------------------------------------------------------------------------------------------------------------------------------------------------|
| <p>captured as "Other CLD)</p> | <p>303.9<br/>303.9[0123]<br/><br/>V11.3<br/>305<br/>305.[0123]<br/><br/>357.5<br/>425.5<br/>535.3<br/>535.3[01]<br/><br/>655.4[013]<br/>760.71<br/><br/>790.3<br/><br/>980.[012389]</p> | <p>F10.2[012]<br/><br/>F10.22[019]<br/>F10.2[3456789]<br/>F10.23[0129]<br/>F10.25[019]<br/>F10.28[0128]<br/><br/>F10.9<br/>F10.9[2459]<br/>F10.92[019]<br/>F10.95[019]<br/>F10.9[678]<br/>F10.98[0128]<br/>G62.1<br/>I42.6<br/>K29.2<br/>K29.2[01]<br/>G31.2<br/>G72.1<br/>Q86.0<br/><br/>O35.4XX[0123459]<br/>K85.2<br/>K86.0</p> | <p>Alcohol-induced mental disorders<br/>Alcohol withdrawal delirium<br/>Alcohol-induced persisting amnesic disorder<br/>Alcohol-induced persisting dementia<br/>Alcohol-induced psychotic disorder with hallucinations<br/>Idiosyncratic alcohol intoxication<br/>Alcohol-induced psychotic disorder with delusions<br/>Other specified alcohol-induced mental disorders<br/>Alcohol withdrawal<br/>Alcohol-induced sleep disorder<br/>Other alcoholic psychosis<br/>Unspecified alcohol-induced mental disorders<br/>Alcohol dependence syndrome<br/>Acute alcoholic intoxication<br/>Other and unspecified alcohol dependence<br/><br/>Alcoholism<br/>Alcohol abuse<br/>Drunkenness NOS<br/>Excessive drinking of alcohol NOS<br/>"Hangover" (alcohol)<br/>Inebriety NOS<br/><br/>Alcoholic polyneuropathy<br/>Alcoholic cardiomyopathy<br/>Alcoholic gastritis<br/><br/>Alcohol affecting fetus or newborn via placenta or breast milk<br/><br/>Excessive blood level of alcohol/Elevated blood-alcohol<br/>Ethyl alcohol/Denatured alcohol/Ethanol/Grain alcohol<br/>Methyl alcohol/Methanol/Wood alcohol<br/>Isopropyl alcohol/Dimethyl carbinol/Isopropanol/Rubbing alcohol<br/>Fusel oil, Alcohol: amyl/butyl/propyl<br/>Other specified alcohols<br/>Unspecified alcohol</p> |
|--------------------------------|-----------------------------------------------------------------------------------------------------------------------------------------------------------------------------------------|------------------------------------------------------------------------------------------------------------------------------------------------------------------------------------------------------------------------------------------------------------------------------------------------------------------------------------|--------------------------------------------------------------------------------------------------------------------------------------------------------------------------------------------------------------------------------------------------------------------------------------------------------------------------------------------------------------------------------------------------------------------------------------------------------------------------------------------------------------------------------------------------------------------------------------------------------------------------------------------------------------------------------------------------------------------------------------------------------------------------------------------------------------------------------------------------------------------------------------------------------------------------------------------------------------------------------------------------------------------------------------------------------------------------------------------------------------------------------------------------------------------------------------------------------------------------------------------------------------------------------------|

|                      |                                                                                           |                                                                                                                                                                                    |                                                                                                                                                                                                                                                                                                                                                                                                                                                                                                                                                                                                                                                                                                                                                                                                                                                                                                                                                                                                                                                                                                                    |
|----------------------|-------------------------------------------------------------------------------------------|------------------------------------------------------------------------------------------------------------------------------------------------------------------------------------|--------------------------------------------------------------------------------------------------------------------------------------------------------------------------------------------------------------------------------------------------------------------------------------------------------------------------------------------------------------------------------------------------------------------------------------------------------------------------------------------------------------------------------------------------------------------------------------------------------------------------------------------------------------------------------------------------------------------------------------------------------------------------------------------------------------------------------------------------------------------------------------------------------------------------------------------------------------------------------------------------------------------------------------------------------------------------------------------------------------------|
|                      |                                                                                           |                                                                                                                                                                                    | <p>ICD-10 Code Descriptions</p> <p>Alcohol abuse<br/> Alcohol dependence<br/> Alcohol use, unspecified<br/> Alcoholic polyneuropathy<br/> Alcoholic cardiomyopathy<br/> Alcoholic gastritis<br/> Degeneration of nervous system due to alcohol<br/> Alcoholic myopathy<br/> Fetal alcohol syndrome (dysmorphic)<br/> Maternal care for (suspected) damage to fetus from alcohol<br/> Alcohol-induced acute pancreatitis<br/> Alcohol-induced chronic pancreatitis</p>                                                                                                                                                                                                                                                                                                                                                                                                                                                                                                                                                                                                                                              |
| Acute Liver Diseases | 573.1<br>573.2<br>573.3<br><br>070.0<br>070.1<br><br>070.41<br>070.43<br>070.51<br>070.53 | K71.0<br>K71.1<br>K71.10<br>K71.11<br>K71.2<br><br>K71.6<br>K71.8<br>K71.9<br><br>K72.0<br>K72.00<br>K72.01<br>K72.9<br>K72.90<br>K72.91<br><br>K75.2<br><br>B15<br>B15.0<br>B15.9 | <p>Excludes n=2110 for acute liver disease. This is a weighted sample size based on the logistic regression analysis for 2012-2016; Exclusion applied after excluding male patients, female patients under age 18, or those without pregnancy event after 20 weeks gestation.</p> <p>ICD-9 Code Descriptions</p> <p>573.1 Hepatitis in viral diseases classified elsewhere (Coxsackie virus disease (074.8), cytomegalic inclusion virus disease (078.5), infectious mononucleosis (075), but does not include hepatitis (in): mumps (072.71), viral (070.0-070.9), yellow fever (060.0-060.9))</p> <p>573.2 Hepatitis in other infectious diseases classified elsewhere (Does not include hepatitis in: late syphilis (095.3), secondary syphilis (091.62), toxoplasmosis (130.5))</p> <p>573.3 Hepatitis, unspecified; Toxic (noninfectious) hepatitis</p> <p>070.0, 070.1 Viral hepatitis A with/ without mention of hepatic coma</p> <p>070.41 Acute hepatitis C with hepatic coma<br/> 070.51 Acute hepatitis C without mention of hepatic coma</p> <p>070.53 Hepatitis E without mention of hepatic coma</p> |

|  |  |                                                                                                                                       |                                                                                                                                                                                                                                                                                                                                                                                                                                                                                                                                                                                                                                                                                                                                                                                                                                                                                                                                                                                                                                                                                                                                                                                                                                                                                                                                                                                                                                                                                                                                                                                                 |
|--|--|---------------------------------------------------------------------------------------------------------------------------------------|-------------------------------------------------------------------------------------------------------------------------------------------------------------------------------------------------------------------------------------------------------------------------------------------------------------------------------------------------------------------------------------------------------------------------------------------------------------------------------------------------------------------------------------------------------------------------------------------------------------------------------------------------------------------------------------------------------------------------------------------------------------------------------------------------------------------------------------------------------------------------------------------------------------------------------------------------------------------------------------------------------------------------------------------------------------------------------------------------------------------------------------------------------------------------------------------------------------------------------------------------------------------------------------------------------------------------------------------------------------------------------------------------------------------------------------------------------------------------------------------------------------------------------------------------------------------------------------------------|
|  |  | <p>B16<br/>B16.0<br/>B16.1<br/>B16.2<br/>B16.9</p> <p>B17<br/>B17.0<br/>B17.1<br/>B17.10<br/>B17.11<br/>B17.2<br/>B17.8<br/>B17.9</p> | <p>070.43 Hepatitis E with hepatic coma (chronic versus acute hepatitis E not specified with ICD-9, thus excluded all hepatitis E as most reflect acute cases)</p> <p>ICD-10 Code Descriptions</p> <p>K71.0 Toxic liver disease with cholestasis<br/>K71.1 Toxic liver disease with hepatic necrosis<br/>K71.10 Toxic liver disease with hepatic necrosis, without coma<br/>K71.11 Toxic liver disease with hepatic necrosis, with coma<br/>K71.2 Toxic liver disease with acute hepatitis<br/>K71.6 Toxic liver disease with hepatitis, not elsewhere classified<br/>K71.8 Toxic liver disease with other disorders of liver<br/>K71.9 Toxic liver disease, unspecified</p> <p>K72.0 Acute and subacute hepatic failure<br/>K72.00 Acute and subacute hepatic failure without coma<br/>K72.01 Acute and subacute hepatic failure with coma</p> <p>K72.9 Hepatic failure, unspecified<br/>K72.90 Hepatic failure, unspecified without coma<br/>K72.91 Hepatic failure, unspecified with coma; Hepatic coma NOS</p> <p>K75.2 Nonspecific reactive hepatitis</p> <p>B15 Acute hepatitis A<br/>B15.0 Hepatitis A with hepatic coma<br/>B15.9 Hepatitis A without hepatic coma; Hepatitis A (acute)(viral) NOS</p> <p>B16 Acute hepatitis B<br/>B16.0 Acute hepatitis B with delta-agent with hepatic coma<br/>B16.1 Acute hepatitis B with delta-agent without hepatic coma<br/>B16.2 Acute hepatitis B without delta-agent with hepatic coma<br/>B16.9 Acute hepatitis B without delta-agent and without hepatic coma; Hepatitis B (acute) (viral) NOS</p> <p>B17 Other acute viral hepatitis</p> |
|--|--|---------------------------------------------------------------------------------------------------------------------------------------|-------------------------------------------------------------------------------------------------------------------------------------------------------------------------------------------------------------------------------------------------------------------------------------------------------------------------------------------------------------------------------------------------------------------------------------------------------------------------------------------------------------------------------------------------------------------------------------------------------------------------------------------------------------------------------------------------------------------------------------------------------------------------------------------------------------------------------------------------------------------------------------------------------------------------------------------------------------------------------------------------------------------------------------------------------------------------------------------------------------------------------------------------------------------------------------------------------------------------------------------------------------------------------------------------------------------------------------------------------------------------------------------------------------------------------------------------------------------------------------------------------------------------------------------------------------------------------------------------|

|                           |                                                                                                                                                                                                                                                                                                                                                                                                                                                                                                                           |                                                                                                                                                                                                                                                                                                                                                                                                                                  |                                                                                                                                                                                                                                                                                                                                                                                                                                                                                                                                                                                                                                                                                                                                                                                                                                                                                                  |
|---------------------------|---------------------------------------------------------------------------------------------------------------------------------------------------------------------------------------------------------------------------------------------------------------------------------------------------------------------------------------------------------------------------------------------------------------------------------------------------------------------------------------------------------------------------|----------------------------------------------------------------------------------------------------------------------------------------------------------------------------------------------------------------------------------------------------------------------------------------------------------------------------------------------------------------------------------------------------------------------------------|--------------------------------------------------------------------------------------------------------------------------------------------------------------------------------------------------------------------------------------------------------------------------------------------------------------------------------------------------------------------------------------------------------------------------------------------------------------------------------------------------------------------------------------------------------------------------------------------------------------------------------------------------------------------------------------------------------------------------------------------------------------------------------------------------------------------------------------------------------------------------------------------------|
|                           |                                                                                                                                                                                                                                                                                                                                                                                                                                                                                                                           |                                                                                                                                                                                                                                                                                                                                                                                                                                  | <p>B17.0 Acute delta-(super) infection of hepatitis B carrier</p> <p>B17.1 Acute hepatitis C</p> <p>B17.10 Acute hepatitis C without hepatic coma; Acute hepatitis C NOS</p> <p>B17.11 Acute hepatitis C with hepatic coma</p> <p>B17.2 Acute hepatitis E</p> <p>B17.8 Other specified acute viral hepatitis; Hepatitis non-A non-B (acute) (viral) NEC</p> <p>B17.9 Acute viral hepatitis, unspecified; Acute hepatitis NOS</p>                                                                                                                                                                                                                                                                                                                                                                                                                                                                 |
| Pregnancy Definitions     |                                                                                                                                                                                                                                                                                                                                                                                                                                                                                                                           |                                                                                                                                                                                                                                                                                                                                                                                                                                  | <p>Discharge and procedure codes used to identify pregnancy records. To avoid double counting records for same pregnancy, only codes indicating an end of pregnancy event were searched. Non-natural causes of pregnancy termination were excluded, as were miscarriages and spontaneous or missed abortions as may occur prior to 20 weeks of gestation.</p>                                                                                                                                                                                                                                                                                                                                                                                                                                                                                                                                    |
| Pregnancy Inclusion Codes | <p>Discharge Codes</p> <p>632</p> <p>634.[0-9][012]</p> <p>640.[09]1</p> <p>641.[012389]1</p> <p>642.[012345679][12]</p> <p>]</p> <p>643.[01289]1</p> <p>644.21</p> <p>645.[12]1</p> <p>646.[0123456789]1</p> <p>646.[124568]2</p> <p>647.[012345689][12]</p> <p>]</p> <p>648.[0123456789][12]</p> <p>]</p> <p>649.[012345678]1</p> <p>649.[0123468]2</p> <p>650</p> <p>651.[0123456789]1</p> <p>652.[0123456789]1</p> <p>653.[0123456789]1</p> <p>654.[0123456789]1</p> <p>654.[013456789]2</p> <p>655.[0123456789]1</p> | <p>Discharge Codes:</p> <p>O60.10X[0123459]</p> <p>O60.12X[0123459]</p> <p>O60.13X[0123459]</p> <p>O60.14X[0123459]</p> <p>O60.2</p> <p>O60.20</p> <p>O60.20X[0123459]</p> <p>O60.22</p> <p>O60.22X[0123459]</p> <p>O60.23</p> <p>O60.23X[0123459]</p> <p>Z37</p> <p>Z37.[012345679]</p> <p>Z37.5[012349]</p> <p>Z37.6[012349]</p> <p>Procedure Codes:</p> <p>0W8NXZZ</p> <p>10D00Z[012]</p> <p>10D07Z[34568]</p> <p>10S07ZZ</p> | <p>Discharge Codes:</p> <p>Preterm labor with preterm delivery</p> <p>Term delivery with preterm labor</p> <p>Outcome of delivery indicator</p> <p>Procedure Codes:</p> <p>Low/Mid/High forceps operation, Outlet forceps operation</p> <p>Forceps rotation of fetal head: DeLee maneuver, Key-in-lock rotation, Kielland rotation, Scanzoni's maneuver;</p> <p>Breech extraction</p> <p>Partial breech extraction with forceps to aftercoming head</p> <p>Other partial breech extraction</p> <p>Total breech extraction with forceps to aftercoming head</p> <p>Other total breech extraction</p> <p>Forceps application to aftercoming head, Piper forceps operation.</p> <p>Vacuum extraction</p> <p>Other instrumental delivery</p> <p>Cesarean section</p> <p>Other cesarean section of unspecified type: Cesarean section NOS, Obstetrical abdominouterotomy, Obstetrical hysterotomy</p> |



|  |                                                                                                                                                                                                                                                                                                                                                                                                                                                                                                                                                                                                                                                                         |  |  |
|--|-------------------------------------------------------------------------------------------------------------------------------------------------------------------------------------------------------------------------------------------------------------------------------------------------------------------------------------------------------------------------------------------------------------------------------------------------------------------------------------------------------------------------------------------------------------------------------------------------------------------------------------------------------------------------|--|--|
|  | <p>656.[012356789]1<br/>656.4[013]<br/>657.01<br/>658.[0123489]1<br/>659.[0123456789]1<br/>660.[0123456789]1<br/>661.[012349]1<br/>662.[0123]1<br/>663.[012345689]1<br/>664.[012345689]1<br/>665.[013456789]1<br/>665.[2789]2<br/>666.[0123]2<br/>667.[01]2<br/>668.[01289][12]<br/>669.[012456789]1<br/>669.[0123489]2<br/>670.[01238]2<br/>671.[0123589]1<br/>671.[0124589]2<br/>672.02<br/>673.[01238]1<br/>673.[01238]2<br/>674.[05]1<br/>674.[01234589]2<br/>675.[01289]1<br/>675.[01289]2<br/>676.[012345689]1<br/>676.[012345689]2<br/>678.[01]1<br/>679.[01]1<br/>679.[01]2<br/>V27.[012345679]</p> <p>Procedure Codes:</p> <p>72.[0123456789]<br/>72.2[19]</p> |  |  |
|--|-------------------------------------------------------------------------------------------------------------------------------------------------------------------------------------------------------------------------------------------------------------------------------------------------------------------------------------------------------------------------------------------------------------------------------------------------------------------------------------------------------------------------------------------------------------------------------------------------------------------------------------------------------------------------|--|--|

|                           |                                                                                                                                                                                                                                                                                                                                                                                  |                                                                                                                                                                                                                                                                                                                                                                             |                                                                                                                                                                                                                                                                                                                                                                                                                                                                                                                                                                                                                                                                                                                                                                               |
|---------------------------|----------------------------------------------------------------------------------------------------------------------------------------------------------------------------------------------------------------------------------------------------------------------------------------------------------------------------------------------------------------------------------|-----------------------------------------------------------------------------------------------------------------------------------------------------------------------------------------------------------------------------------------------------------------------------------------------------------------------------------------------------------------------------|-------------------------------------------------------------------------------------------------------------------------------------------------------------------------------------------------------------------------------------------------------------------------------------------------------------------------------------------------------------------------------------------------------------------------------------------------------------------------------------------------------------------------------------------------------------------------------------------------------------------------------------------------------------------------------------------------------------------------------------------------------------------------------|
|                           | 72.3[19]<br>72.5[1234]<br>72.7[19]<br>74.[01249]<br>74.99                                                                                                                                                                                                                                                                                                                        |                                                                                                                                                                                                                                                                                                                                                                             |                                                                                                                                                                                                                                                                                                                                                                                                                                                                                                                                                                                                                                                                                                                                                                               |
| Pregnancy Exclusion Codes | <p>Discharge Codes:</p> <p>Pregnant with non-natural termination:</p> 630<br>631<br>631.[08]<br>633<br>633.0<br>633.0[01]<br>633.1<br>633.1[01]<br><br>633.2<br>633.2[01]<br>633.8<br>633.8[01]<br>633.9<br>633.9[01]<br><br>635.[012345679][012]<br>636.[012345679][012]<br>637.[012345679][012]<br>638<br>638.[0123456789] <p>Miscarriage or spontaneous/misssed abortion:</p> | <p>Discharge Codes:</p> <p>Pregnant with non-natural termination:</p> 000<br>000.[01289]<br>001<br>001.[019]<br>002<br>002[089]<br>002.8<br>002.8[19]<br>002.9<br>004.8<br>004.8[09]<br>007 <p>Miscarriage or spontaneous/missed abortion:</p> 002.1<br>003<br>003.[012]<br>003.3<br>003.3[0123456789]<br>003.[45678]<br>003.8[0123456789]<br>003.9 <p>Procedure Codes:</p> | <p>This excludes n=156,690. Exclusion applied after excluding male patients, female patients under age 18, or those without pregnancy event after 20 weeks gestation.</p> <p>Discharge Codes:</p> <p>Ectopic pregnancy<br/>Hydatidiform mole<br/>Other abnormal products of conception<br/>(Induced) termination of pregnancy<br/>Failed attempted termination of pregnancy<br/>Miscarriage or spontaneous/missed abortion</p> <p>Procedure Codes:</p> <p>Dilation and curettage for termination of pregnancy<br/>Aspiration curettage of uterus for termination of pregnancy, Therapeutic abortion NOS<br/>Removal of extratubal ectopic pregnancy<br/>Hysterotomy to terminate pregnancy, Therapeutic abortion by hysterotomy<br/>Intra-amniotic injection for abortion</p> |

|                                                                         |                                                                                                                          |                                                                                                                                                                                                |                                                                                                                                                                                                                                                                                                                                                                                                                                                                                                                                                                                                                                                                                                                                                                                                                                                                                                                                                                                                                                   |
|-------------------------------------------------------------------------|--------------------------------------------------------------------------------------------------------------------------|------------------------------------------------------------------------------------------------------------------------------------------------------------------------------------------------|-----------------------------------------------------------------------------------------------------------------------------------------------------------------------------------------------------------------------------------------------------------------------------------------------------------------------------------------------------------------------------------------------------------------------------------------------------------------------------------------------------------------------------------------------------------------------------------------------------------------------------------------------------------------------------------------------------------------------------------------------------------------------------------------------------------------------------------------------------------------------------------------------------------------------------------------------------------------------------------------------------------------------------------|
|                                                                         | 634.[0123456789][012]<br><br>Procedure Codes:<br><br>Non-naturally terminated<br>69.01<br>69.51<br>74.3<br>74.91<br>75.0 | Non-naturally terminated<br>10A0[034]ZZ<br>10A07Z6<br>10A07ZX<br>10A07ZZ<br>10A08ZZ<br>10T2[034]ZZ                                                                                             |                                                                                                                                                                                                                                                                                                                                                                                                                                                                                                                                                                                                                                                                                                                                                                                                                                                                                                                                                                                                                                   |
| <b>Study Outcomes</b>                                                   |                                                                                                                          |                                                                                                                                                                                                |                                                                                                                                                                                                                                                                                                                                                                                                                                                                                                                                                                                                                                                                                                                                                                                                                                                                                                                                                                                                                                   |
| Hypertensive complication (pre-eclampsia, eclampsia, or HELLP syndrome) | 642.4x<br><br>642.7x<br><br>642.5x<br><br>642.6x                                                                         | O14.00<br>O14.90<br>O14.0[23]<br>O14.9[23]<br>O15.2<br><br>O11.9<br>O11.[123]<br>O15.2<br><br>O14.10<br>O14.20<br>O14.1[23]<br>O14.2[23]<br><br>O15.00<br>O15.9<br>O15.0[23]<br>O15.1<br>O15.2 | Mild or unspecified pre-eclampsia<br>Mild to moderate pre-eclampsia, unspecified trimester<br>Unspecified pre-eclampsia, unspecified trimester<br>Mild to moderate pre-eclampsia, [second/third] trimester<br>Unspecified pre-eclampsia, [second/third] trimester<br>Eclampsia in the puerperium<br><br>Pre-eclampsia or eclampsia superimposed on pre-existing hypertension<br>Pre-existing hypertension with pre-eclampsia, unspecified trimester<br>Pre-existing hypertension with pre-eclampsia, [first/second/third] trimester<br>Eclampsia in the puerperium<br><br>Severe pre-eclampsia/HELLP<br>Severe pre-eclampsia, unspecified trimester<br>HELLP syndrome (HELLP), unspecified trimester<br>Severe pre-eclampsia, [second/third] trimester<br>HELLP syndrome (HELLP), [second/third] trimester<br><br>Eclampsia<br>Eclampsia in pregnancy, unspecified trimester<br>Eclampsia, unspecified as to time period<br>Eclampsia in pregnancy, [second/third] trimester<br>Eclampsia in labor<br>Eclampsia in the puerperium |

|                             |                                                      |                                                                                                      |                                                                                                                                                                                                                                                                                                                                                                                                                                                                                                                                                                                                                                                                                                                                                                                                                                                                                                                                   |
|-----------------------------|------------------------------------------------------|------------------------------------------------------------------------------------------------------|-----------------------------------------------------------------------------------------------------------------------------------------------------------------------------------------------------------------------------------------------------------------------------------------------------------------------------------------------------------------------------------------------------------------------------------------------------------------------------------------------------------------------------------------------------------------------------------------------------------------------------------------------------------------------------------------------------------------------------------------------------------------------------------------------------------------------------------------------------------------------------------------------------------------------------------|
| Postpartum hemorrhage       | 666.0[024]<br>666.1[024]<br>666.2[024]<br>666.3[024] | O72.[0123]                                                                                           |                                                                                                                                                                                                                                                                                                                                                                                                                                                                                                                                                                                                                                                                                                                                                                                                                                                                                                                                   |
| Pre-term birth (<37 weeks)  | 644.20<br>644.21                                     | O60.10xx[0123459]<br>O60.12xx[0123459]<br>O60.13xx[0123459]<br>O60.14xx[0123459]                     | Codes (644.20, 644.21) each include:<br>Onset (spontaneous) of delivery before 37 completed weeks of gestation<br>Premature labor with onset of delivery before 37 completed weeks of gestation<br><br>Preterm labor with preterm delivery                                                                                                                                                                                                                                                                                                                                                                                                                                                                                                                                                                                                                                                                                        |
| Fetal growth restriction    | 656.5[013]                                           | O36.59[1239]                                                                                         |                                                                                                                                                                                                                                                                                                                                                                                                                                                                                                                                                                                                                                                                                                                                                                                                                                                                                                                                   |
| Large for gestational age   | 653.5[013]<br>656.6[013]                             | O36.60X[0123459]<br>O36.61X[0123459]<br>O36.62X[0123459]<br>O36.63X[0123459]                         |                                                                                                                                                                                                                                                                                                                                                                                                                                                                                                                                                                                                                                                                                                                                                                                                                                                                                                                                   |
| Fetal death                 | V27.1, V27.3, V27.4,<br>V27.6, V27.7,<br>656.4[013]  | Z37.1, Z37.3, Z37.4,<br>Z37.6[012349], Z37.7,<br>O36.4XX[0123459]                                    | Stillborn (at least one, if multiple gestation)<br>Fetal death: NOS, after completion of 22 weeks' gestation, late, Missed delivery                                                                                                                                                                                                                                                                                                                                                                                                                                                                                                                                                                                                                                                                                                                                                                                               |
| <b>Additional Variables</b> |                                                      |                                                                                                      |                                                                                                                                                                                                                                                                                                                                                                                                                                                                                                                                                                                                                                                                                                                                                                                                                                                                                                                                   |
| Cirrhosis                   | 571.2<br>571.5<br>571.6                              | K70.30<br>K70.31<br><br>K71.7<br>K72.10<br>K72.11<br><br>K74.3<br>K74.4<br>K74.5<br>K74.60<br>K74.69 | 571.2 Alcoholic cirrhosis of liver: Florid cirrhosis, Laennec's cirrhosis (alcoholic)<br>571.5 Cirrhosis of liver without mention of alcohol: Cirrhosis of liver: NOS, cryptogenic, macronodular, micronodular, posthepatic, postnecrotic, Healed yellow atrophy (liver), Portal cirrhosis<br>571.6 Biliary cirrhosis: Chronic nonsuppurative destructive cholangitis, Cirrhosis: cholangitic, cholestatic<br><br>K70.30 Alcoholic cirrhosis of liver without ascites<br>K70.31 Alcoholic cirrhosis of liver with ascites<br><br>K71.7 Toxic liver disease with fibrosis and cirrhosis of liver<br>K72.10 Chronic hepatic failure without coma<br>K72.11 Chronic hepatic failure with coma<br><br>K74.3 Primary biliary cirrhosis, Chronic nonsuppurative destructive cholangitis<br>K74.4 Secondary biliary cirrhosis<br>K74.5 Biliary cirrhosis, unspecified<br>K74.60 Unspecified cirrhosis of liver, Cirrhosis (of liver) NOS |

|                            |                                                                                                                                                                                             |                                                                                                                                                                                                                                   |                                                                                                                                                                                                                                                                                                                                                                                                                                                                                                                                                                                                                                                                                                                                                                                |
|----------------------------|---------------------------------------------------------------------------------------------------------------------------------------------------------------------------------------------|-----------------------------------------------------------------------------------------------------------------------------------------------------------------------------------------------------------------------------------|--------------------------------------------------------------------------------------------------------------------------------------------------------------------------------------------------------------------------------------------------------------------------------------------------------------------------------------------------------------------------------------------------------------------------------------------------------------------------------------------------------------------------------------------------------------------------------------------------------------------------------------------------------------------------------------------------------------------------------------------------------------------------------|
|                            |                                                                                                                                                                                             |                                                                                                                                                                                                                                   | K74.69 Other cirrhosis of liver Cryptogenic cirrhosis (of liver) Macronodular cirrhosis (of liver), Micronodular cirrhosis (of liver) Mixed type cirrhosis (of liver) Portal cirrhosis (of liver) Postnecrotic cirrhosis (of liver)                                                                                                                                                                                                                                                                                                                                                                                                                                                                                                                                            |
| Diabetes, pre-existing     | without chronic complications<br>249.00-249.31,<br>250.00-250.33,<br>648.00-648.04<br><br>with chronic complications<br>249.40-249.91,<br>250.40-250.93                                     | without chronic complications<br>E08.xx<br>E09.xx<br>E10.xx<br>E11.xx<br>E13.xx<br>O24.[01389]xx<br><br>with chronic complications<br>E08.[234568]xxx<br>E09.[234568]xxx<br>E10.[234568]xxx<br>E11.[234568]xxx<br>E13.[234568]xxx | ICD-9 Codes based on this source, with minor modification to remove codes specifically for fetal records: <a href="https://www.hcup-us.ahrq.gov/toolssoftware/comorbidity/Table2-FY12-V3_7.pdf">https://www.hcup-us.ahrq.gov/toolssoftware/comorbidity/Table2-FY12-V3_7.pdf</a><br><br>ICD-10 Codes based on this source, with minor modification to remove codes specifically for fetal records: <a href="https://www.hcup-us.ahrq.gov/toolssoftware/comorbidityicd10/comformat_icd10cm_2019_1.txt">https://www.hcup-us.ahrq.gov/toolssoftware/comorbidityicd10/comformat_icd10cm_2019_1.txt</a>                                                                                                                                                                              |
| Hypertension, pre-existing | 401.0<br>401.1<br>401.9<br>405<br>405.0<br>405.01<br>405.09<br>405.1<br>405.11<br>405.19<br>405.9<br>405.91<br>405.99<br>642.0[0-4]<br>642.1[0-4]<br>642.2[0-4]<br>642.7[0-4]<br>642.9[0-4] | I10.<br>I15.0<br>I15.1<br>I15.2<br>I15.8<br>I15.9<br><br>O10.011<br>O10.012<br>O10.013<br>O10.019<br><br>O10.02<br>O10.03<br><br>O10.411<br>O10.412<br>O10.413<br>O10.419                                                         | ICD-9 Code Descriptions<br><br>401 Essential hypertension: Malignant, Benign, Unspecified<br>405 Secondary hypertension: Malignant (Renovascular, Other), Benign (Renovascular, Other), Unspecified (Renovascular, Other)<br>642.0 Benign essential hypertension complicating pregnancy, childbirth, and the puerperium<br>642.1 Hypertension secondary to renal disease, complicating pregnancy, childbirth, and the puerperium<br>642.2 Other pre-existing hypertension complicating pregnancy, childbirth, and the puerperium<br>642.7 Pre-eclampsia or eclampsia superimposed on pre-existing hypertension<br>642.9 Unspecified hypertension complicating pregnancy, childbirth, or the puerperium<br><br>ICD-10 Code Descriptions<br><br>Essential (primary) hypertension |

|                            |                                                                                                     |                                                                                                                              |                                                                                                                                                                                                                                                                                                                                                                                                                                                                                                                                        |
|----------------------------|-----------------------------------------------------------------------------------------------------|------------------------------------------------------------------------------------------------------------------------------|----------------------------------------------------------------------------------------------------------------------------------------------------------------------------------------------------------------------------------------------------------------------------------------------------------------------------------------------------------------------------------------------------------------------------------------------------------------------------------------------------------------------------------------|
|                            |                                                                                                     | O10.42<br>O10.43<br><br>O10.911<br>O10.912<br>O10.913<br>O10.919<br>O10.92<br>O10.93<br><br>O11.9<br>O11.1<br>O11.2<br>O11.3 | Pre-existing essential hypertension complicating pregnancy or childbirth or puerperium<br>Unspecified pre-existing hypertension complicating pregnancy or childbirth or puerperium<br>Renovascular hypertension<br>Hypertension secondary to other renal disorders<br>Pre-existing secondary hypertension complicating pregnancy or childbirth or puerperium<br>Pre-existing hypertension with pre-eclampsia<br>Hypertension secondary to endocrine disorders<br>Other secondary hypertension<br>Secondary hypertension, unspecified   |
| Dyslipidemia, pre-existing | 272.0<br>272.1<br>272.2<br>272.4                                                                    | E78.0<br>E78.1<br>E78.2<br>E78.4<br>E78.5                                                                                    | Pure hypercholesterolemia<br>Pure hyperglyceridemia<br>Mixed hyperlipidemia<br>Other hyperlipidemia<br>Hyperlipidemia, unspecified                                                                                                                                                                                                                                                                                                                                                                                                     |
| Obesity, pre-existing      | 278.01<br>278.00<br>278.03<br>649.1[01234]<br>793.91<br>V85.3[0123456789]<br>V85.4[12345]<br>V85.54 | E66.0[19]<br>E66.[1289]<br>O99.21[012345]<br>R93.9<br>Z68.3[0123456789]<br>Z68.4[12345]<br>Z68.54                            | Morbid (severe) obesity due to excess calories<br>Other obesity due to excess calories<br>Drug-induced obesity<br>Morbid (severe) obesity with alveolar hypoventilation<br>Other obesity<br>Obesity, unspecified<br>Obesity complicating pregnancy<br>Obesity complicating childbirth<br>Obesity complicating the puerperium<br>Diagnostic imaging inconclusive due to excess body fat of patient<br>Body mass index (BMI) 30.0 or greater, adult<br>Body mass index (BMI) pediatric, greater than or equal to 95th percentile for age |
| Multiple gestation         | V27.2<br>V27.3<br>V27.4<br>V27.5<br>V27.6<br>V27.7                                                  | Z37.2<br>Z37.3<br>Z37.4<br>Z37.50<br>Z37.5[12349]<br>Z37.6[012349]                                                           | Twins, both liveborn<br>Twins, one liveborn and one stillborn<br>Twins, both stillborn<br>Multiple births, unspecified, all liveborn<br>Triplets/Quadruplets/Quintuplets/Sextuplets/Other multiple births, all liveborn<br>Triplets/Quadruplets/Quintuplets/Sextuplets/Other multiple births, some liveborn                                                                                                                                                                                                                            |

|                                                         |                                    |                                                                                                |                                                                                                                                                                                                                                                                                                                                                                                                                                                                                                                                                                                                                                                                                                                                                                                                                                                                                                                          |
|---------------------------------------------------------|------------------------------------|------------------------------------------------------------------------------------------------|--------------------------------------------------------------------------------------------------------------------------------------------------------------------------------------------------------------------------------------------------------------------------------------------------------------------------------------------------------------------------------------------------------------------------------------------------------------------------------------------------------------------------------------------------------------------------------------------------------------------------------------------------------------------------------------------------------------------------------------------------------------------------------------------------------------------------------------------------------------------------------------------------------------------------|
|                                                         |                                    | Z37.7                                                                                          | Other multiple births, all stillborn                                                                                                                                                                                                                                                                                                                                                                                                                                                                                                                                                                                                                                                                                                                                                                                                                                                                                     |
| Gestational diabetes mellitus                           | 648.8[01234]                       | O99.81[045]<br><br>O24.4,<br>O24.41, O24.41[049]<br>O24.42, O24.42[049]<br>O24.43, O24.43[049] | Abnormal glucose tolerance; Includes Gestational diabetes<br>Abnormal glucose complicating pregnancy, childbirth and the puerperium                                                                                                                                                                                                                                                                                                                                                                                                                                                                                                                                                                                                                                                                                                                                                                                      |
| Mode of delivery:<br>Cesarean section*<br>Vaginal birth | 765, 766<br><br>[767/768, 774/775] | 783, 784, 785<br>786, 787, 788<br><br>[768,<br>796, 797, 798,<br>805, 806, 807]                | ICD-9 DRG Codes, V34, <a href="https://www.cms.gov/icd10manual/version34-fullcode-cms/fullcode_cms/P0372.html">https://www.cms.gov/icd10manual/version34-fullcode-cms/fullcode_cms/P0372.html</a><br><br>CESAREAN SECTION WITH/WITHOUT CC/MCC<br>[VAGINAL DELIVERY WITH STERILIZATION AND/OR D&C,<br>VAGINAL DELIVERY WITH O.R. PROCEDURE EXCEPT STERILIZATION AND/OR D&C,<br>VAGINAL DELIVERY WITH/WITHOUT COMPLICATING DIAGNOSES]<br><br>ICD-10 DRG Codes, V36 (2019), <a href="https://www.cms.gov/ICD10Manual/version36-fullcode-cms/fullcode_cms/P0370.html">https://www.cms.gov/ICD10Manual/version36-fullcode-cms/fullcode_cms/P0370.html</a><br><br>CESAREAN SECTION WITH/WITHOUT STERILIZATION WITH/WITHOUT CC/MCC<br>[VAGINAL DELIVERY WITH O.R. PROC EXCEPT STERIL &/OR D&C<br>VAGINAL DELIVERY WITH STERILIZATION/D&C WITH/WITHOUT CC/MCC<br>VAGINAL DELIVERY WITHOUT STERILIZATION/D&C WITH/WITHOUT CC/MCC] |

\* DRG = Diagnosis Related Group. DRGs comprise a patient classification system that categorizes patients into groups that are clinically coherent and homogeneous with respect to resource use. DRGs group patients according to diagnosis, type of treatment (procedures), age, and other relevant criteria. Each hospital stay has one DRG assigned to it. Reference: Healthcare Cost and Utilization Project (HCUP) Statistical Briefs [Internet]. Hospitalizations Related to Diabetes in Pregnancy, 2008 Statistical Brief #102; Lauren M Wier, MPH, Eva Witt, BA, Jackie Burgess, MBA, and Anne Elixhauser, PhD. Published: December 2010.

Supplemental Table 2. Association of NAFLD with Adverse Maternal and Perinatal Outcomes, Further Adjusted for Gestational Diabetes

|                                                                              | NAFLD vs Other CLD      |                 | NAFLD vs No CLD           |                 |
|------------------------------------------------------------------------------|-------------------------|-----------------|---------------------------|-----------------|
|                                                                              | AOR*, 95% CI            | p value         | AOR*, 95% CI              | p value         |
| <b>Maternal Outcomes</b>                                                     |                         |                 |                           |                 |
| Hypertensive complications (pre-eclampsia, eclampsia, and/or HELLP syndrome) | <b>2.93 (2.41-3.56)</b> | <b>&lt;.001</b> | <b>2.96 (2.47-3.55)</b>   | <b>&lt;.001</b> |
| Postpartum hemorrhage                                                        | 1.18 (0.91-1.54)        | .22             | <b>1.65 (1.27-2.14)</b>   | <b>&lt;.001</b> |
| Maternal death <sup>†</sup>                                                  | 3.82 (0.37-39.33)       | .26             | <b>17.9 (2.12-150.81)</b> | <b>.008</b>     |
| <b>Perinatal Outcomes</b>                                                    |                         |                 |                           |                 |
| Pre-term birth (<37 weeks)                                                   | 1.00 (0.78-1.27)        | .99             | <b>1.56 (1.24-1.97)</b>   | <b>&lt;.001</b> |
| Fetal growth restriction                                                     | <b>0.42 (0.25-0.7)</b>  | <b>.001</b>     | 0.73 (0.44-1.21)          | .22             |
| Large for gestational age                                                    | <b>1.70 (1.26-2.29)</b> | <b>&lt;.001</b> | 1.05 (0.79-1.38)          | .75             |
| Fetal death                                                                  | 0.71 (0.36-1.39)        | .32             | 0.99 (0.51-1.92)          | .98             |

Abbreviations: nonalcoholic fatty liver disease (NAFLD), chronic liver disease (CLD), hemolysis, elevated liver tests, low platelets (HELLP) \*Adjusted odds ratios (AORs) and confidence intervals (CIs) were computed for each study outcome using logistic regression and adjusted for age, race, multiple gestation, pre-existing diabetes, hypertension, dyslipidemia, obesity, and gestational diabetes; N= 17,263,795 for all models except maternal death (17,260,870 for maternal death model) of available 18,574,225

<sup>†</sup>Reflects 5 deaths in NAFLD group, 35 deaths in other CLD group, and 920 deaths in no CLD group.



Supplemental Table 3. Association of NAFLD with Adverse Maternal and Perinatal Outcomes Excluding Pregnancies with Pre-existing Diabetes

|                                                                             | NAFLD vs non-NAFLD CLD  |                 | NAFLD vs no CLD         |                 |
|-----------------------------------------------------------------------------|-------------------------|-----------------|-------------------------|-----------------|
|                                                                             | AOR*, 95% CI            | p value         | AOR*, 95% CI            | p value         |
| <b>Maternal Outcomes</b>                                                    |                         |                 |                         |                 |
| Hypertensive complication (pre-eclampsia, eclampsia, and/or HELLP syndrome) | <b>3.46 (2.79-4.21)</b> | <b>&lt;.001</b> | <b>3.43 (2.83-4.16)</b> | <b>&lt;.001</b> |
| Postpartum hemorrhage                                                       | 1.20 (0.91-1.59)        | .21             | <b>1.68 (1.28-2.21)</b> | <b>&lt;.001</b> |
| Maternal death <sup>†</sup>                                                 | 4.88 (0.46-51)          | .19             | <b>24.16 (2.82-207)</b> | <b>.004</b>     |
| <b>Perinatal Outcomes</b>                                                   |                         |                 |                         |                 |
| Pre-term birth (<37 weeks)                                                  | 1.21 (0.94-1.56)        | .14             | <b>1.91 (1.50-2.44)</b> | <b>&lt;.001</b> |
| Fetal growth restriction                                                    | <b>0.45 (0.26-0.77)</b> | <b>.003</b>     | 0.78 (0.46-1.32)        | .36             |
| Large for gestational age                                                   | <b>1.95 (1.40-2.70)</b> | <b>&lt;.001</b> | 1.21 (0.89-1.64)        | .23             |
| Fetal death                                                                 | 0.63 (0.28-1.44)        | .27             | 0.89 (0.40-2.00)        | .78             |

*Abbreviations: nonalcoholic fatty liver disease (NAFLD), chronic liver disease (CLD), hemolysis, elevated liver tests, low platelets (HELLP). \*Adjusted odds ratios (AORs) and confidence intervals (CIs) were computed for each study outcome using logistic regression and adjusted for age, race, multiple gestation, pre-existing hypertension, dyslipidemia, obesity; n= 17,075,950 for all models except maternal death (17,073,050 for maternal death model). † Reflects 5 deaths in NAFLD group, 35 deaths in other CLD group, and 855 deaths in no CLD group.*

Supplemental Table 4. Association of NAFLD with Adverse Maternal and Perinatal Outcomes Restricted to Use of ICD-9

|                                                                             | NAFLD vs non-NAFLD CLD  |                 | NAFLD vs no CLD         |                 |
|-----------------------------------------------------------------------------|-------------------------|-----------------|-------------------------|-----------------|
|                                                                             | AOR*, 95% CI            | p value         | AOR*, 95% CI            | p value         |
| <b>Maternal Outcomes</b>                                                    |                         |                 |                         |                 |
| Hypertensive complication (pre-eclampsia, eclampsia, and/or HELLP syndrome) | <b>4.36 (3.47-5.48)</b> | <b>&lt;.001</b> | <b>4.44 (3.60-5.48)</b> | <b>&lt;.001</b> |
| Postpartum hemorrhage                                                       | 1.35 (0.98-1.87)        | .07             | <b>1.88 (1.36-2.58)</b> | <b>&lt;.001</b> |
| Maternal death <sup>†</sup>                                                 | 10.09 (0.76-135)        | .08             | <b>33.27 (3.69-300)</b> | <b>.002</b>     |
| <b>Fetal Outcomes</b>                                                       |                         |                 |                         |                 |
| <b>Pre-term birth (&lt;37 weeks)</b>                                        | <b>1.32 (1.04-1.69)</b> | <b>.03</b>      | <b>2.23 (1.77-2.82)</b> | <b>&lt;.001</b> |
| Fetal growth restriction                                                    | <b>0.49 (0.29-0.81)</b> | <b>.006</b>     | 0.89 (0.54-1.48)        | 0.65            |
| Large for gestational age                                                   | <b>2.20 (1.55-3.14)</b> | <b>&lt;.001</b> | <b>1.41 (1.02-1.96)</b> | <b>0.04</b>     |
| Fetal death                                                                 | 0.55 (0.20-1.49)        | .24             | 0.82 (0.30-2.19)        | 0.69            |

Abbreviations: nonalcoholic fatty liver disease (NAFLD), chronic liver disease (CLD), hemolysis, elevated liver tests, low platelets (HELLP). \*Adjusted odds ratios (AORs) and confidence intervals (CIs) were computed for each study outcome using logistic regression and adjusted for age, race, multiple gestation, pre-existing diabetes, hypertension, dyslipidemia, and obesity; n= 12,936,084 for all models except maternal death (12,935,244 for maternal death model). <sup>†</sup> Reflects 5 deaths in NAFLD group, 20 deaths in other CLD group, and 680 deaths in no CLD group.

Supplemental Table 5. Association of NAFLD with Adverse Maternal and Perinatal Outcomes Excluding Pregnancies with Pre-existing Diabetes, Dyslipidemia, or Obesity from the No CLD Group.

|                                                                             | NAFLD vs no CLD         |                 |
|-----------------------------------------------------------------------------|-------------------------|-----------------|
|                                                                             | AOR*, 95% CI            | p value         |
| Hypertensive complication (pre-eclampsia, eclampsia, and/or HELLP syndrome) | <b>3.87 (3.09-4.86)</b> | <b>&lt;.001</b> |
| Postpartum hemorrhage                                                       | <b>1.76 (1.31-2.36)</b> | <b>&lt;.001</b> |
| Maternal death <sup>†</sup>                                                 | <b>53.66 (7.3-394)</b>  | <b>&lt;.001</b> |
| Pre-term birth (<37 weeks)                                                  | <b>2.00 (1.55-2.57)</b> | <b>&lt;.001</b> |
| Fetal growth restriction                                                    | 0.95 (0.57-1.59)        | 0.85            |
| Large for gestational age                                                   | 1.08 (0.75-1.55)        | 0.68            |
| Fetal death                                                                 | 1.02 (0.51-2.05)        | 0.95            |

Abbreviations: nonalcoholic fatty liver disease (NAFLD), chronic liver disease (CLD), hemolysis, elevated liver tests, low platelets (HELLP). \*Adjusted odds ratios (AORs) and confidence intervals (CIs) were computed for each study outcome using logistic regression and adjusted for age, race, multiple gestation, pre-existing diabetes, hypertension, dyslipidemia, and obesity; N= 17,263,795 for all models except maternal death (17,260,870 for maternal death model) of available 18,574,225. † Reflects 5 deaths in NAFLD group, 35 deaths in non-NAFLD CLD group and 920 deaths in non-CLD group.

**Supplemental Figure 1.** Temporal Trends in non-NAFLD Chronic Liver Disease Prevalence in Pregnancy (2007-2016).  
P-value < 0.001 (test of trend).

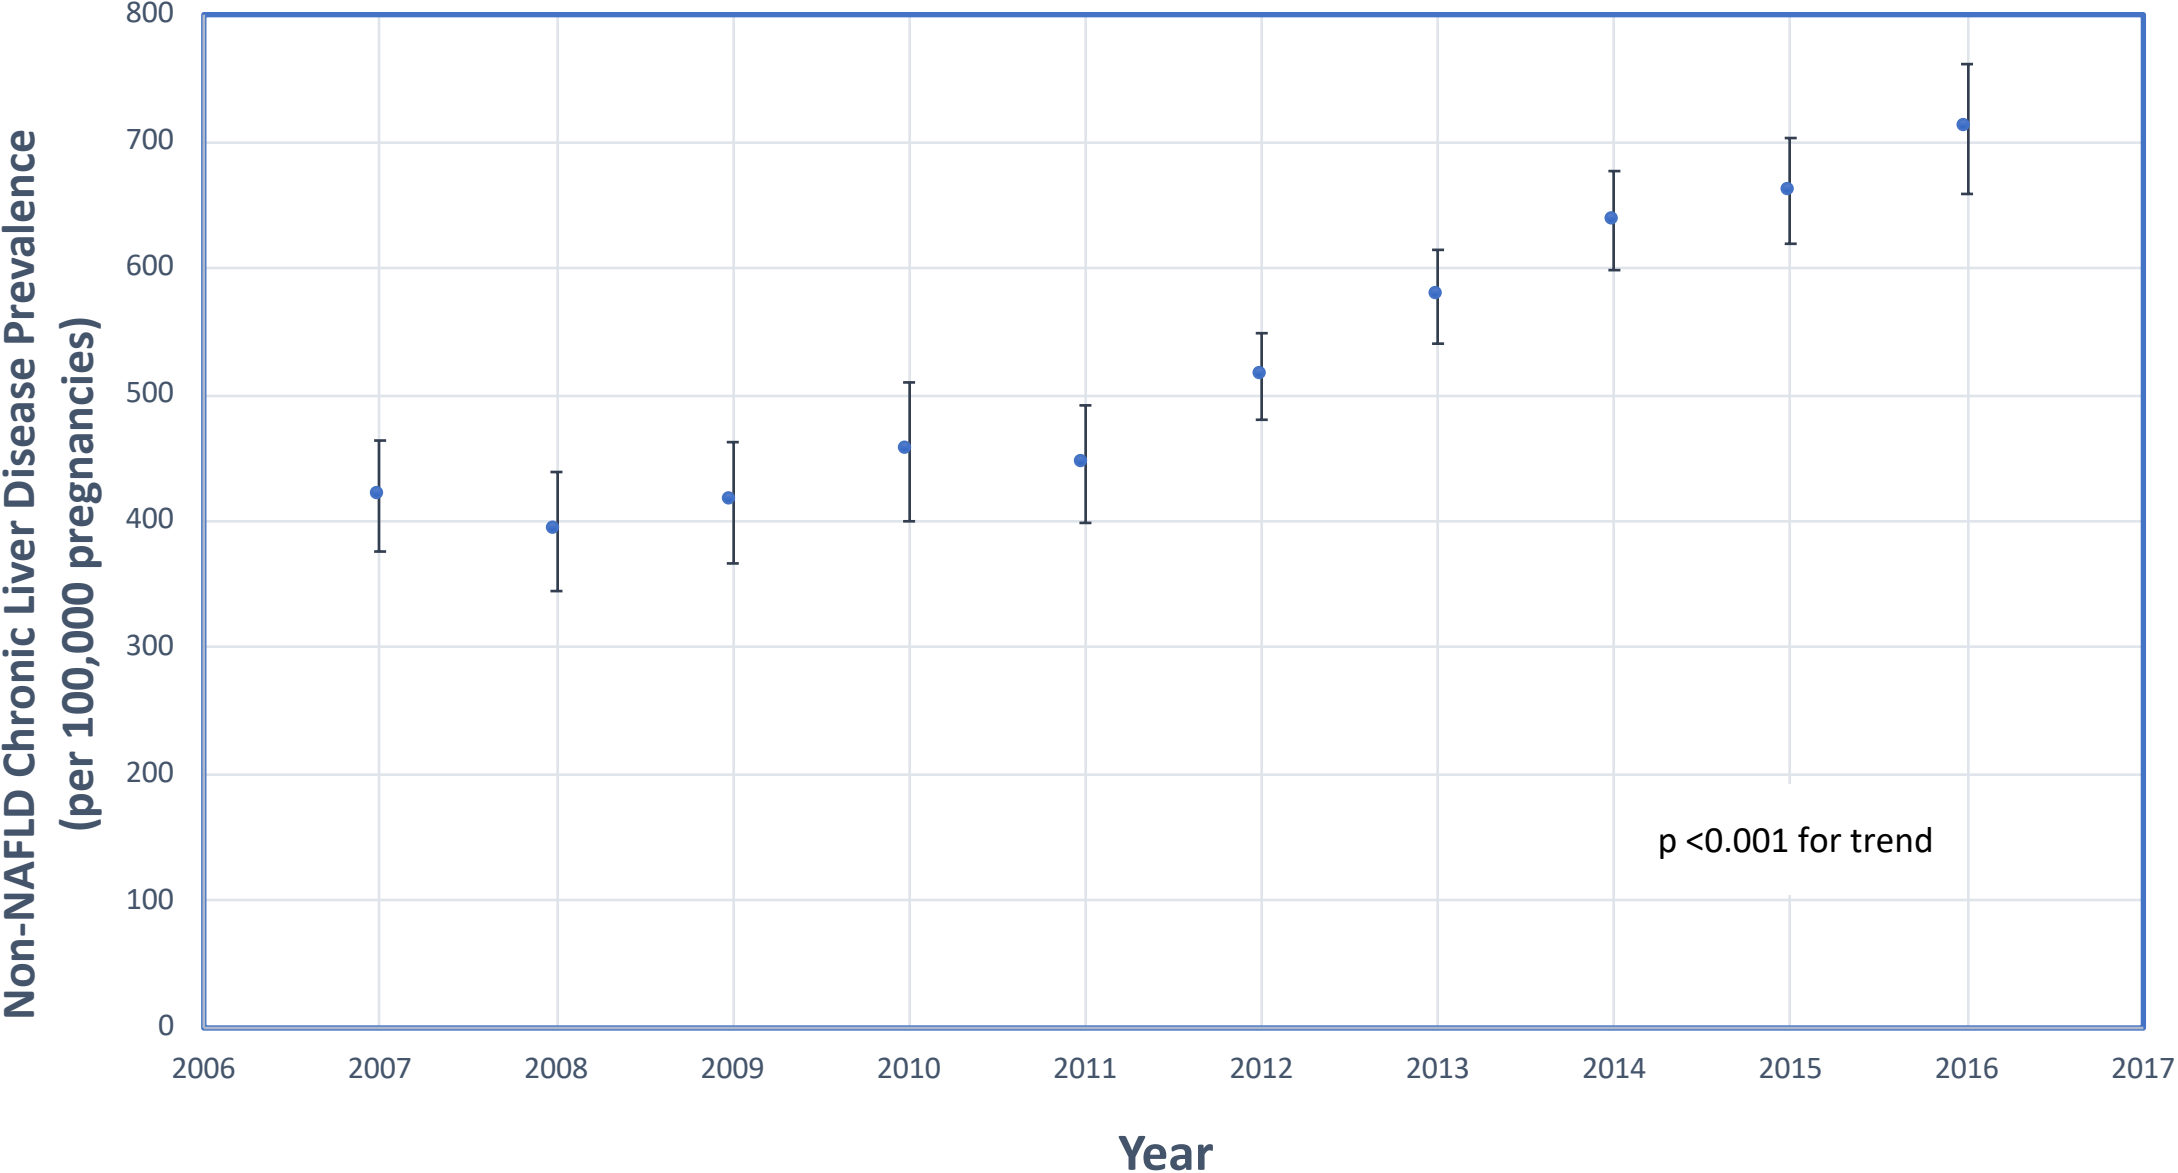

Supplement: NIHMS1601598-supplement-2.pdf [file NIHMS1601598-supplement-2.pdf]
